# Supplementary material for: Detailing cloud property feedbacks with a regime-based decomposition
Source: Springer Nature journal article supplement (doi:10.1007/s00382-022-06488-7), 2022-09-11
Supplement: MOESM1 [file 382_2022_6488_MOESM1_ESM.pdf]

# SI for Detailing Cloud Property Feedbacks with a Regime-Based Decomposition

Mark D. Zelinka · Ivy Tan · Lazaros Oreopoulos · George Tselioudis

Received: date / Accepted: date

## 1 Introduction

In this document we provide five supplementary figures. In Figure 1a we show the zonal mean multi-model mean across-regime components (with inter-model standard deviation indicated with shading) from Equation 8. From this it is clear that at every latitude, the third term ( $\Delta f_r C'_r \overline{K}$ ; green line) dominates and is very close in magnitude to the total across-regime term (black dashed line; shading omitted for clarity). Term 1 ( $\Delta f_r \overline{C} \overline{K}$ ; blue line) and term 2 ( $\Delta f_r \overline{C} K'_r$ ; orange line) are very small at all locations, while term 4 ( $\Delta f_r C'_r K'_r$ ; red line) is non-negligible but still smaller than term 3 at middle latitudes. The global means of all terms of Equation 8 are shown in Figure 1b. This demonstrates the dominance of term 3 for the global mean in each individual model.

---

M. Zelinka  
Lawrence Livermore National Laboratory  
7000 East Avenue, L-103  
Livermore, CA 94550, USA  
E-mail: zelinka1@llnl.gov

I. Tan  
McGill University  
Room 817, Burnside Hall  
805 Sherbrooke Street West  
Montreal, Quebec, H3A 0B9, Canada

L. Oreopoulos  
NASA/GSFC  
Mail Code: 613  
Greenbelt, MD 20771, USA

G. Tselioudis  
NASA Goddard Institute for Space Studies  
2880 Broadway  
New York, NY 10025, USA

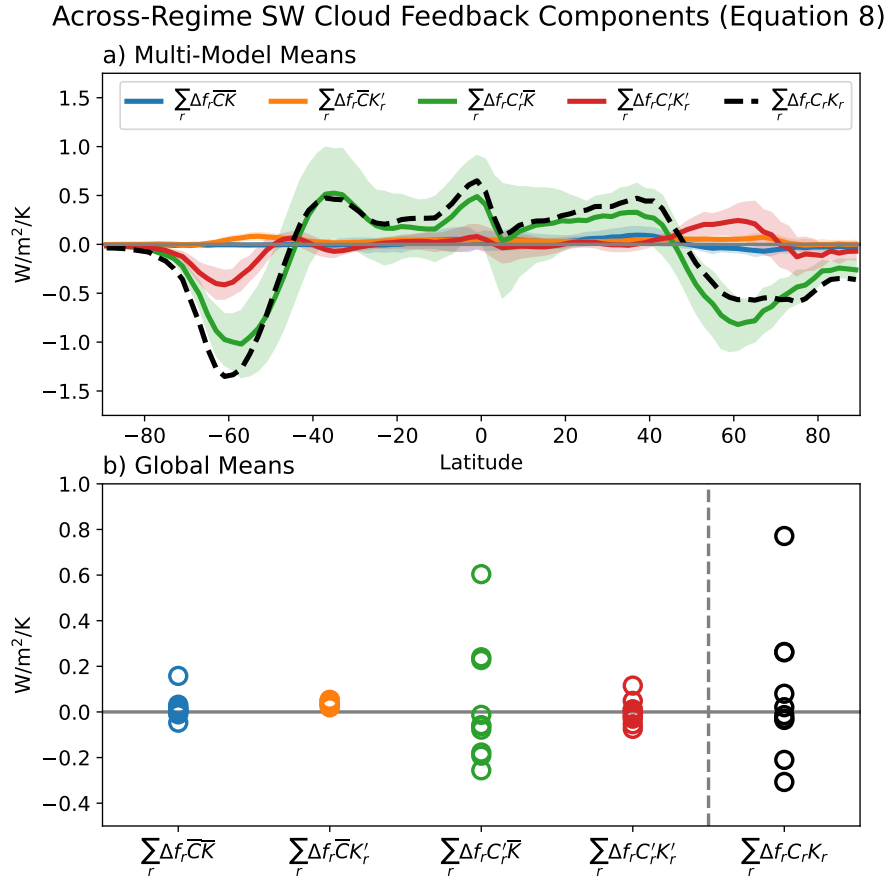

**Fig. 1** (a) Zonal-mean across-regime SW cloud feedback components from Equation 8. Multi-model means and standard deviations are indicated with lines and shading, respectively. For clarity, the total across-regime component (black dashed) is shown without shading. (b) Global mean across-regime SW cloud feedback components for each model.

13 The remaining four figures show results derived from projecting model  
 14 cloud fields onto the 11 MODIS cloud regimes of Cho et al (2021) rather than  
 15 the 8 ISCCP cloud regimes of Tselioudis et al (2021). Because there is no  
 16 1:1 match between ISCCP and MODIS regimes, we show in this document  
 17 the results that are integrated across regimes, that is, the MODIS regime  
 18 equivalent of Figures 7, 8, 10, and 11 of the main text.

## 19 References

20 Cho N, Tan J, Oreopoulos L (2021) Classifying Planetary Cloudiness with  
 21 an Updated Set of MODIS Cloud Regimes. *Journal of Applied Meteorology and Climatology* 60(7):981–997, DOI 10.1175/JAMC-D-20-0247.1,  
 22

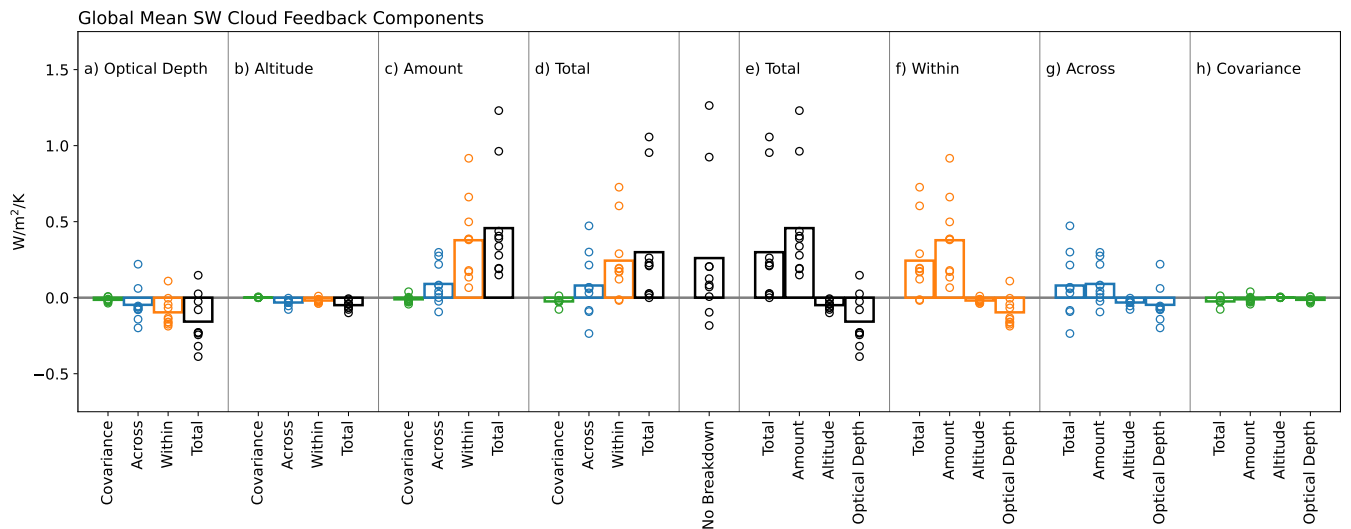

**Fig. 2** As in Figure 7 of the main text, but for GCM cloud fields matched to the 11 MODIS cloud regimes.

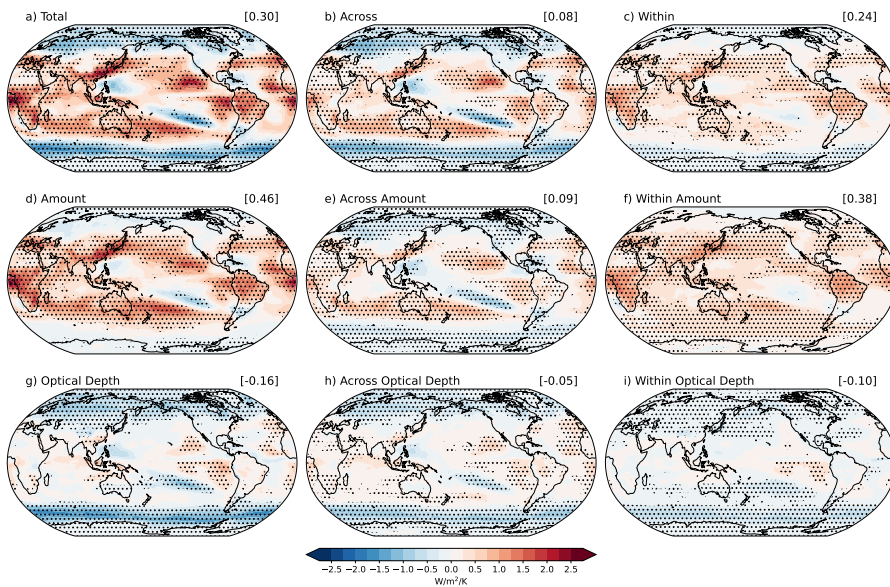

**Fig. 3** As in Figure 8 of the main text, but for GCM cloud fields matched to the 11 MODIS cloud regimes.

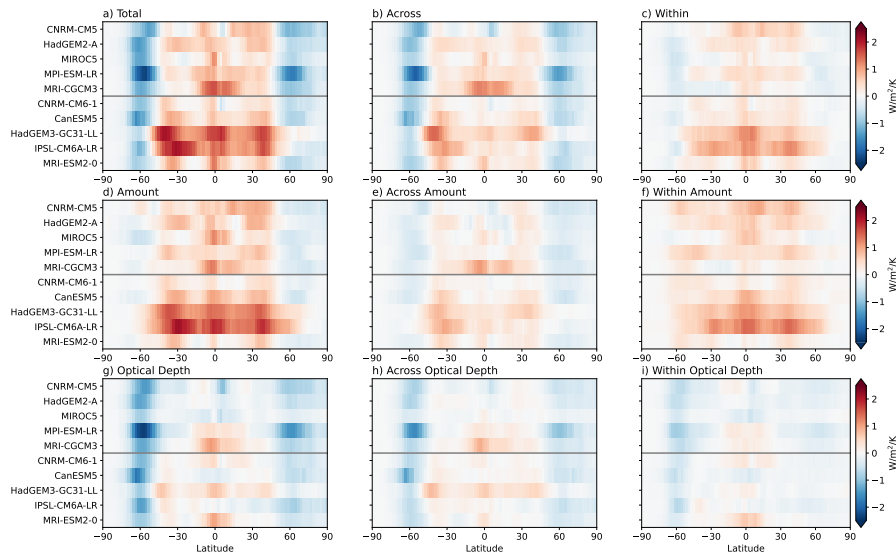

**Fig. 4** As in Figure 10 of the main text, but for GCM cloud fields matched to the 11 MODIS cloud regimes.

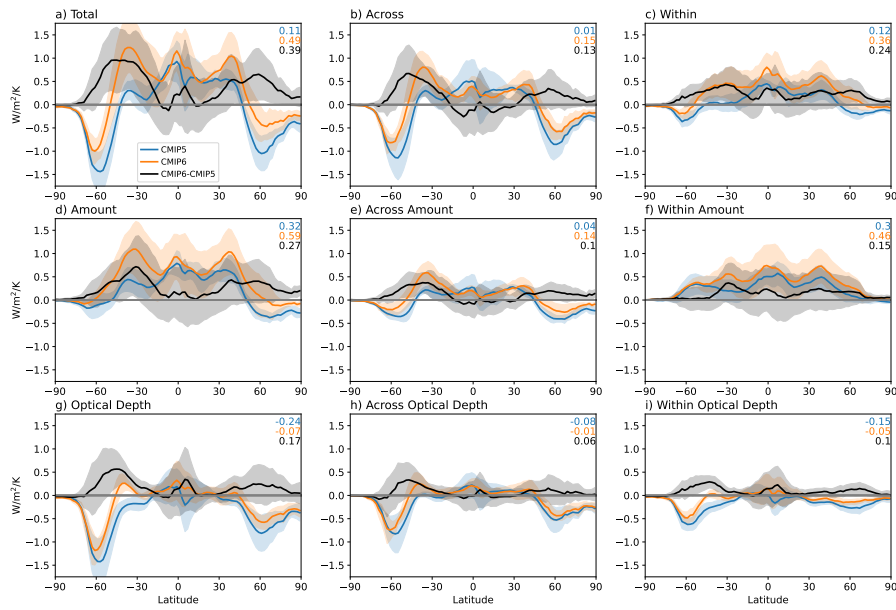

**Fig. 5** As in Figure 11 of the main text, but for GCM cloud fields matched to the 11 MODIS cloud regimes.

23 URL [https://journals.ametsoc.org/view/journals/apme/aop/](https://journals.ametsoc.org/view/journals/apme/aop/JAMC-D-20-0247.1/JAMC-D-20-0247.1.xml)  
24 [JAMC-D-20-0247.1/JAMC-D-20-0247.1.xml](https://journals.ametsoc.org/view/journals/apme/aop/JAMC-D-20-0247.1/JAMC-D-20-0247.1.xml), publisher: American Meteoro-  
25 logical Society Section: Journal of Applied Meteorology and Climatology  
26 Tselioudis G, Rossow WB, Jakob C, Remillard J, Tropf D, Zhang Y (2021)  
27 Evaluation of Clouds, Radiation, and Precipitation in CMIP6 Models  
28 Using Global Weather States Derived from ISCCP-H Cloud Property Data.  
29 Journal of Climate 34(17):7311–7324, DOI 10.1175/JCLI-D-21-0076.1,  
30 URL [https://journals.ametsoc.org/view/journals/clin/aop/](https://journals.ametsoc.org/view/journals/clin/aop/JCLI-D-21-0076.1/JCLI-D-21-0076.1.xml)  
31 [JCLI-D-21-0076.1/JCLI-D-21-0076.1.xml](https://journals.ametsoc.org/view/journals/clin/aop/JCLI-D-21-0076.1/JCLI-D-21-0076.1.xml), publisher: American Meteoro-  
32 logical Society Section: Journal of Climate
